# Supplementary material for: Global transpiration data from sap flow measurements: theSAPFLUXNET database
Source: Copernicus journal article supplement (doi:10.5194/essd-2020-227), 2020-10-09
Supplement: Supplementary file 1 [file essd-2020-227-supplement.zip]

*Supplement of*

**Global transpiration data from sap flow measurements: the  
SAPFLUXNET database**

**Rafael Poyatos *et al.***

*Correspondence to:* Rafael Poyatos (r.poyatos@creaf.uab.cat)

## Tables

**Table S1** Data checks implemented in the first level of data quality control (QC1).

| Check                            | Description                                                                                                                                                                                                                                |
|----------------------------------|--------------------------------------------------------------------------------------------------------------------------------------------------------------------------------------------------------------------------------------------|
| Metadata variables               | All metadata variables are checked for presence and expected class (numeric, character, logical...).                                                                                                                                       |
| Character variables values       | All metadata character variables are checked against the possible values (factor levels) for that variable, raising a warning if some value is unexpected.                                                                                 |
| E-mail check                     | E-mail provided by contributors is checked for validity                                                                                                                                                                                    |
| Coordinates and biome            | Site coordinates are checked for correctness (are they inside the specified country?) and fixed if needed and possible. Annual temperature and precipitation are obtained from these coordinates and biome is estimated from these values. |
| Soil texture                     | Percentages of soil textures are used to calculate the USDA classification category.                                                                                                                                                       |
| Species names                    | Species names in plant and species metadata are checked for spelling errors and the concordance between both metadata variables is also checked                                                                                            |
| Plant treatments                 | Check for uniformity in the treatment declared by plant.                                                                                                                                                                                   |
| Environmental variables presence | Check for concordance between the declared variables in the environmental metadata and the environmental data.                                                                                                                             |
| Timestamp                        | Format, NA presence (there is data, but there is no timestamp), concordance and continuity are checked.                                                                                                                                    |
| Gap presence:                    | Data gaps (There is TIMESTAMP but there is no data) are summarised and visualized.                                                                                                                                                         |
| Soil water content               | Check for percentage soil water content values and transform them to $\text{cm}^3/\text{cm}^3$                                                                                                                                             |

**Table S2.** Data checks implemented in the second level of data quality control (QC2).

| <b>Data check</b>                              | <b>Description</b>                                                                                                                                                           |
|------------------------------------------------|------------------------------------------------------------------------------------------------------------------------------------------------------------------------------|
| Sap flow units harmonisation                   | Sap flow expressed in $\text{cm}^3 \text{h}^{-1}$ , sap flow per unit leaf/sapwood area in $\text{cm}^3 \text{cm}^{-2} \text{h}^{-1}$                                        |
| Out of range detection                         | Out of range values are flagged automatically, examined in a visual app and removed if confirmed                                                                             |
| Outlier detection                              | Outliers are flagged automatically, examined in a visual app and removed if confirmed                                                                                        |
| Radiation transformations                      | Interconversion between shortwave radiation (sw_in) and photosynthetically active radiation (ppfd_in)                                                                        |
| VPD and relative humidity                      | Interconversion between VPD and relative humidity                                                                                                                            |
| Extraterrestrial radiation and solar timestamp | Calculation of extraterrestrial radiation and solar timestamp from timestamp and geographical data                                                                           |
| Sap flow interconversions                      | When sapwood or leaf areas were available, interconversions were applied between the different expression levels for sap flow (per plant, per sapwood area or per leaf area) |

**Table S3.** Datasets in the SAPFLUXNET database identified by numeric code, dataset code and site name. Number of species per dataset, geographic coordinates and elevation are also shown. Negative coordinate values are shown for Southern and Western Hemispheres.

| #  | Dataset code    | Site name             | Lat.   | Long.  | Elev.<br>(m) | N spp. |
|----|-----------------|-----------------------|--------|--------|--------------|--------|
| 1  | ARG_MAZ         | Mazaruca_Patagonia    | -51.58 | -72.29 | 550          | 1      |
| 2  | ARG_TRE         | Tres Marias           | -51.32 | -72.18 | 460          | 1      |
| 3  | AUS_BRI_BRI     | Britannia Creek       | -37.87 | 145.85 | 707          | 1      |
| 4  | AUS_CAN_ST1_EUC | Cann River            | -37.58 | 149.17 | 180          | 1      |
| 5  | AUS_CAN_ST2_MIX | Cann River            | -37.58 | 149.17 | 180          | 2      |
| 6  | AUS_CAN_ST3_ACA | Cann River            | -37.58 | 149.17 | 180          | 1      |
| 7  | AUS_CAR_THI_00F | Carrajung             | -38.38 | 146.68 | 610          | 1      |
| 8  | AUS_CAR_THI_0P0 | Carrajung             | -38.38 | 146.68 | 610          | 1      |
| 9  | AUS_CAR_THI_0PF | Carrajung             | -38.38 | 146.68 | 610          | 1      |
| 10 | AUS_CAR_THI_CON | Carrajung             | -38.38 | 146.68 | 610          | 1      |
| 11 | AUS_CAR_THI_T00 | Carrajung             | -38.38 | 146.68 | 610          | 1      |
| 12 | AUS_CAR_THI_T0F | Carrajung             | -38.38 | 146.68 | 610          | 1      |
| 13 | AUS_CAR_THI_TP0 | Carrajung             | -38.38 | 146.68 | 610          | 1      |
| 14 | AUS_CAR_THI_TPF | Carrajung             | -38.38 | 146.68 | 610          | 1      |
| 15 | AUS_ELL_HB_HIG  | Ella                  | -36.78 | 146.58 | 705          | 2      |
| 16 | AUS_ELL_MB_MOD  | Ella                  | -36.78 | 146.58 | 693          | 1      |
| 17 | AUS_ELL_UNB     | Ella                  | -36.78 | 146.58 | 737          | 1      |
| 18 | AUS_KAR         | Karijini NP           | -22.62 | 118.22 | 710          | 1      |
| 19 | AUS_MAR_HSD_HIG | Maroondah             | -37.64 | 145.58 | 468          | 2      |
| 20 | AUS_MAR_HSW_HIG | Maroondah             | -37.65 | 145.57 | 297          | 2      |
| 21 | AUS_MAR_MSD_MOD | Maroondah             | -37.64 | 145.58 | 467          | 2      |
| 22 | AUS_MAR_MSW_MOD | Maroondah             | -37.65 | 145.57 | 261          | 2      |
| 23 | AUS_MAR_UBD     | Maroondah             | -37.69 | 145.56 | 303          | 3      |
| 24 | AUS_MAR_UBW     | Maroondah             | -37.89 | 145.57 | 336          | 3      |
| 25 | AUS_RIC_EUC_ELE | Richmond NSW EucFACE  | -33.62 | 150.74 | 23           | 1      |
| 26 | AUS_WOM         | WombatStateForest     | -37.42 | 144.09 | 705          | 2      |
| 27 | AUT_PAT_FOR     | Patscherkofel         | 47.21  | 11.45  | 1950         | 1      |
| 28 | AUT_PAT_KRU     | Patscherkofel         | 47.21  | 11.45  | 2180         | 1      |
| 29 | AUT_PAT_TRE     | Patscherkofel         | 47.21  | 11.45  | 2110         | 1      |
| 30 | AUT_TSC         | Tschirgant south      | 47.23  | 10.84  | 750          | 1      |
| 31 | BRA_CAM         | Campos do Jordão      | -22.69 | -45.52 | 2000         | 1      |
| 32 | BRA_CAX_CON     | Caxiuana              | -1.79  | -51.43 | 15           | 8      |
| 33 | BRA_SAN         | Santa Virgínia (PESM) | -23.28 | -45.18 | 1000         | 4      |
| 34 | CAN_TUR_P39_POS | TUR                   | 42.71  | -80.36 | 184          | 1      |
| 35 | CAN_TUR_P39_PRE | TUR                   | 42.71  | -80.36 | 184          | 1      |
| 36 | CAN_TUR_P74     | TUR                   | 42.71  | -80.35 | 184          | 1      |
| 37 | CHE_DAV_SEE     | Davos                 | 46.82  | 9.86   | 1650         | 1      |

| #  | Dataset code    | Site name                                | Lat.  | Long.  | Elev.<br>(m) | N spp. |
|----|-----------------|------------------------------------------|-------|--------|--------------|--------|
| 38 | CHE_LOT_NOR     | Lotschental                              | 46.39 | 7.76   | 1300         | 2      |
| 39 | CHE_PFY_CON     | Pfynwald                                 | 46.30 | 7.60   | 615          | 1      |
| 40 | CHE_PFY_IRR     | Pfynwald                                 | 46.30 | 7.60   | 615          | 1      |
| 41 | CHN_ARG_GWD     | Arghan                                   | 40.75 | 89.99  | 830          | 1      |
| 42 | CHN_ARG_GWS     | Arghan                                   | 41.38 | 89.94  | 830          | 1      |
| 43 | CHN_HOR_AFF     | Horqin                                   | 42.72 | 122.37 | 226          | 1      |
| 44 | CHN_YIN_ST1     | Yingbazar                                | 42.45 | 85.72  | 900          | 1      |
| 45 | CHN_YIN_ST2_DRO | Yingbazar                                | 42.11 | 85.13  | 930          | 1      |
| 46 | CHN_YIN_ST3_DRO | Yingbazar                                | 42.29 | 85.99  | 930          | 1      |
| 47 | CHN_YUN_YUN     | Yunxiao                                  | 23.92 | 117.42 | 0            | 2      |
| 48 | COL_MAC_SAF_RAD | Macagual Universidad de la Amazonia      | 1.50  | -75.36 | 360          | 1      |
| 49 | CRI_TAM_TOW     | TAMU Soltis Center                       | 10.39 | -84.63 | 600          | 17     |
| 50 | CZE_BIK         | Bik                                      | 49.49 | 18.53  | 875          | 1      |
| 51 | CZE_BIL_BIL     | Bilovice                                 | 49.25 | 16.69  | 320          | 1      |
| 52 | CZE_KRT_KRT     | Krtiny                                   | 49.32 | 16.75  | 480          | 1      |
| 53 | CZE_LAN         | Lanžhot                                  | 48.68 | 16.95  | 150          | 3      |
| 54 | CZE_LIZ_LES     | Liz                                      | 49.07 | 13.68  | 858          | 1      |
| 55 | CZE_RAJ_RAJ     | Rajec                                    | 49.44 | 16.70  | 600          | 1      |
| 56 | CZE_SOB_SOB     | Sobesice                                 | 49.25 | 16.69  | 320          | 1      |
| 57 | CZE_STI         | Stitna nad Vlari                         | 49.04 | 17.97  | 550          | 1      |
| 58 | CZE_UTE_BEE     | Utechov                                  | 49.28 | 16.65  | 420          | 1      |
| 59 | CZE_UTE_BNA     | Utechov                                  | 49.28 | 16.65  | 390          | 1      |
| 60 | CZE_UTE_BPO     | Utechov                                  | 49.28 | 16.65  | 370          | 1      |
| 61 | CZE_UTE_SPR     | Utechov                                  | 49.28 | 16.65  | 360          | 1      |
| 62 | DEU_HIN_OAK     | Hinnensee                                | 53.33 | 13.19  | 90           | 1      |
| 63 | DEU_HIN_TER     | Hinnensee                                | 53.33 | 13.19  | 95           | 2      |
| 64 | DEU_MER_BEE_NON | Merzalben                                | 49.27 | 7.81   | 550          | 1      |
| 65 | DEU_MER_BEE_THI | Merzalben                                | 49.27 | 7.81   | 550          | 1      |
| 66 | DEU_MER_DOU_NON | Merzalben                                | 49.27 | 7.81   | 550          | 1      |
| 67 | DEU_MER_DOU_THI | Merzalben                                | 49.27 | 7.81   | 550          | 1      |
| 68 | DEU_MER_MIX_NON | Merzalben                                | 49.27 | 7.81   | 550          | 2      |
| 69 | DEU_MER_MIX_THI | Merzalben                                | 49.27 | 7.81   | 550          | 2      |
| 70 | DEU_STE_2P3     | Stechlin                                 | 53.10 | 13.00  | 78           | 1      |
| 71 | DEU_STE_4P5     | Stechlin                                 | 53.10 | 13.00  | 78           | 1      |
| 72 | ESP_ALT_ARM     | Alto Tajo                                | 40.78 | -2.33  | 1079         | 3      |
| 73 | ESP_ALT_HUE     | Alto Tajo                                | 40.79 | -2.29  | 907          | 2      |
| 74 | ESP_ALT_TRI     | Alto Tajo                                | 40.80 | -2.23  | 981          | 2      |
| 75 | ESP_CAN         | Can Balasc                               | 41.43 | 2.07   | 270          | 4      |
| 76 | ESP_GUA_VAL     | Guadarrama                               | 40.90 | -4.03  | 1140         | 1      |
| 77 | ESP_LAH_COM     | LaHarina                                 | 37.74 | -3.38  | 180          | 1      |
| 78 | ESP_LAS         | Las Canadas, Teide natinal park tenerife | 28.31 | -16.57 | 2070         | 1      |

| #   | Dataset code    | Site name                        | Lat.  | Long.  | Elev.<br>(m) | N spp. |
|-----|-----------------|----------------------------------|-------|--------|--------------|--------|
| 79  | ESP_MAJ_MAI     | Majadas del Tietar               | 39.94 | -5.77  | 260          | 1      |
| 80  | ESP_MAJ_NOR_LM1 | Majadas del Tietar               | 39.94 | -5.77  | 260          | 1      |
| 81  | ESP_MON_SIE_NAT | Montejo                          | 41.12 | -3.50  | 1400         | 3      |
| 82  | ESP_RIN         | Rinconada experimental catchment | 40.60 | -6.02  | 1200         | 1      |
| 83  | ESP_RON_PIL     | Ronda                            | 36.69 | -5.02  | 1734         | 2      |
| 84  | ESP_SAN_A_45I   | Sanabria orchard                 | 37.25 | -5.80  | 49           | 1      |
| 85  | ESP_SAN_A2_45I  | Sanabria orchard                 | 37.25 | -5.80  | 49           | 1      |
| 86  | ESP_SAN_B_100   | Sanabria orchard                 | 37.25 | -5.80  | 49           | 1      |
| 87  | ESP_SAN_B2_100  | Sanabria orchard                 | 37.25 | -5.80  | 49           | 1      |
| 88  | ESP_TIL_MIX     | Tillar                           | 41.33 | 1.01   | 1018         | 2      |
| 89  | ESP_TIL_OAK     | Tillar                           | 41.33 | 1.01   | 1011         | 1      |
| 90  | ESP_TIL_PIN     | Tillar                           | 41.33 | 1.01   | 1065         | 1      |
| 91  | ESP_VAL_BAR     | Vallcebre                        | 42.20 | 1.82   | 1102         | 1      |
| 92  | ESP_VAL_SOR     | Vallcebre                        | 42.20 | 1.81   | 1257         | 1      |
| 93  | ESP_YUN_C1      | Yunquera                         | 36.72 | -4.97  | 1220         | 1      |
| 94  | ESP_YUN_C2      | Yunquera                         | 36.72 | -4.97  | 1180         | 1      |
| 95  | ESP_YUN_T1_THI  | Yunquera                         | 36.72 | -4.97  | 1190         | 1      |
| 96  | ESP_YUN_T3_THI  | Yunquera                         | 36.72 | -4.97  | 1185         | 1      |
| 97  | FIN_HYY_SME     | Hyttiala Forest Field Station    | 61.85 | 24.29  | 185          | 2      |
| 98  | FIN_PET         | Petsikko                         | 69.49 | 27.23  | 251          | 1      |
| 99  | FRA_FON         | Fontainebleau-Barbeau            | 48.48 | 2.78   | 105          | 2      |
| 100 | FRA_HES_HE1_NON | Hesse                            | 48.67 | 7.06   | 300          | 1      |
| 101 | FRA_HES_HE2_NON | Hesse                            | 48.67 | 7.06   | 300          | 1      |
| 102 | FRA_PUE         | Puechabon                        | 43.74 | 3.60   | 270          | 1      |
| 103 | GBR_ABE_PLO     | Aberfeldy                        | 56.62 | -3.80  | 340          | 1      |
| 104 | GBR_DEV_CON     | Devilla                          | 56.03 | -3.72  | 75           | 1      |
| 105 | GBR_DEV_DRO     | Devilla                          | 56.03 | -3.72  | 75           | 1      |
| 106 | GBR_GUI_ST1     | Guisachan                        | 57.27 | -4.82  | 300          | 1      |
| 107 | GBR_GUI_ST2     | Guisachan                        | 57.27 | -4.82  | 300          | 1      |
| 108 | GBR_GUI_ST3     | Guisachan                        | 57.27 | -4.82  | 300          | 1      |
| 109 | GUF_GUY_GUY     | Guyaflux                         | 5.28  | -52.92 | 40           | 6      |
| 110 | GUF_GUY_ST2     | Guyaflux                         | 5.28  | -52.91 | 45           | 7      |
| 111 | GUF_NOU_PET     | Nouragues station                | 4.08  | -52.68 | 120          | 10     |
| 112 | HUN_SIK         | Sikfokut                         | 47.93 | 20.44  | 330          | 2      |
| 113 | IDN_JAM_OIL     | Jambi                            | -2.07 | 102.79 | 71           | 1      |
| 114 | IDN_JAM_RUB     | Jambi                            | -2.10 | 102.78 | 90           | 1      |
| 115 | IDN_PON_STE     | Pono                             | -1.49 | 120.06 | 1050         | 8      |
| 116 | ISR_YAT_YAT     | Yatir                            | 31.34 | 35.05  | 650          | 1      |
| 117 | ITA_FEI_S17     | Feichtwald-Matsch                | 46.69 | 10.61  | 1715         | 1      |
| 118 | ITA_KAE_S20     | Kaelbergangl-Matsch              | 46.70 | 10.61  | 1990         | 1      |
| 119 | ITA_MAT_S21     | Matscher Alm-Matsch              | 46.74 | 10.69  | 2100         | 2      |

| #   | Dataset code    | Site name              | Lat.   | Long.   | Elev.<br>(m) | N spp. |
|-----|-----------------|------------------------|--------|---------|--------------|--------|
| 120 | ITA_MUN         | Muntatschinig-Matsch   | 46.68  | 10.58   | 1160         | 1      |
| 121 | ITA_REN         | Renon                  | 46.59  | 11.43   | 1794         | 3      |
| 122 | ITA_RUN_N20     | Runer Koepfl-Matsch    | 46.70  | 10.64   | 2030         | 2      |
| 123 | ITA_TOR         | Torgnon                | 45.82  | 7.56    | 2100         | 1      |
| 124 | JPN_EBE_HYB     | Ebetsu                 | 43.08  | 141.52  | 40           | 1      |
| 125 | JPN_EBE_SUG     | Ebetsu                 | 43.08  | 141.52  | 40           | 1      |
| 126 | KOR_TAE_TC1_LOW | Taehwa                 | 37.30  | 127.32  | 160          | 1      |
| 127 | KOR_TAE_TC2_MED | Taehwa                 | 37.30  | 127.32  | 160          | 1      |
| 128 | KOR_TAE_TC3_EXT | Taehwa                 | 37.30  | 127.32  | 160          | 1      |
| 129 | MDG_SEM_TAL     | Semi-mature forest     | -18.93 | 48.71   | 950          | 6      |
| 130 | MDG_YOU_SHO     | Young secondary forest | -18.95 | 48.40   | 990          | 1      |
| 131 | MEX_COR_YP      | Cortadura              | 19.49  | -97.04  | 2180         | 1      |
| 132 | MEX_VER_BSJ     | VERACRUZ_BSJ           | 19.51  | -96.98  | 1440         | 5      |
| 133 | MEX_VER_BSM     | VERACRUZ_BSM           | 19.53  | -96.99  | 1524         | 2      |
| 134 | NLD_LOO         | Loobos                 | 52.17  | 5.74    | 25           | 1      |
| 135 | NLD_SPE_DOU     | Speulderbos            | 52.25  | 5.69    | 50           | 1      |
| 136 | NZL_HUA_HUA     | Huapai                 | -36.80 | 174.49  | 90           | 1      |
| 137 | PRT_LEZ_ARN     | LEZIRIAS               | 38.83  | -8.82   | 15           | 1      |
| 138 | PRT_MIT         | MITRA II               | 38.54  | -8.00   | 235          | 1      |
| 139 | PRT_PIN         | Pinheiro da Cruz       | 38.25  | -8.76   | 5            | 2      |
| 140 | RUS_CHE_LOW     | Cherskii               | 68.74  | 161.50  | 90           | 1      |
| 141 | RUS_CHE_Y4      | CHE                    | 68.74  | 161.41  | 6            | 1      |
| 142 | RUS_FYO         | Fyodorovskoye          | 56.46  | 32.92   | 260          | 3      |
| 143 | RUS_POG_VAR     | Pogorelsky Bor         | 56.36  | 92.95   | 243          | 3      |
| 144 | SEN_SOU_IRR     | Souilène               | 16.34  | -15.43  | 10           | 1      |
| 145 | SEN_SOU_POS     | Souilène               | 16.34  | -15.43  | 10           | 1      |
| 146 | SEN_SOU_PRE     | Souilène               | 16.34  | -15.43  | 10           | 1      |
| 147 | SWE_NOR_ST1_AF1 | Norunda                | 60.09  | 17.48   | 45           | 2      |
| 148 | SWE_NOR_ST1_AF2 | Norunda                | 60.09  | 17.48   | 45           | 2      |
| 149 | SWE_NOR_ST1_BEF | Norunda                | 60.09  | 17.48   | 45           | 2      |
| 150 | SWE_NOR_ST2     | Norunda                | 60.09  | 17.48   | 45           | 2      |
| 151 | SWE_NOR_ST3     | Norunda                | 60.09  | 17.48   | 45           | 2      |
| 152 | SWE_NOR_ST4_AFT | Norunda                | 60.08  | 17.48   | 45           | 3      |
| 153 | SWE_NOR_ST4_BEF | Norunda                | 60.08  | 17.48   | 45           | 2      |
| 154 | SWE_NOR_ST5_REF | Norunda                | 60.08  | 17.48   | 45           | 3      |
| 155 | SWE_SKO_MIN     | Skogaryd               | 58.36  | 12.15   | 76           | 1      |
| 156 | SWE_SKY_38Y     | Skyttorp               | 60.13  | 17.84   | 50           | 1      |
| 157 | SWE_SKY_68Y     | Skyttorp               | 60.10  | 17.83   | 50           | 2      |
| 158 | SWE_SVA_MIX_NON | Svartberget            | 64.26  | 19.77   | 267          | 2      |
| 159 | THA_KHU         | Khu-Muang              | 15.27  | 103.08  | 150          | 1      |
| 160 | USA_BNZ_BLA     | BNZSPRC1               | 64.70  | -148.32 | 50           | 1      |

| #   | Dataset code    | Site name                                                       | Lat.  | Long.   | Elev.<br>(m) | N spp. |
|-----|-----------------|-----------------------------------------------------------------|-------|---------|--------------|--------|
| 161 | USA_CHE_ASP     | ChEAS                                                           | 45.94 | -90.27  | 477          | 6      |
| 162 | USA_CHE_MAP     | ChEAS                                                           | 45.95 | -90.26  | 1565         | 2      |
| 163 | USA_DUK_HAR     | Duke Blackwood Hardwood                                         | 36.98 | -79.09  | 163          | 6      |
| 164 | USA_HIL_HF1_POS | Hill Demonstration Forest                                       | 36.22 | -78.86  | 174          | 5      |
| 165 | USA_HIL_HF1_PRE | Hill Demonstration Forest                                       | 36.22 | -78.86  | 174          | 5      |
| 166 | USA_HIL_HF2     | Hill Demonstration Forest                                       | 36.22 | -78.86  | 174          | 7      |
| 167 | USA_HUY_LIN_NON | Huyck Preserve Lincoln Pond                                     | 42.53 | -74.16  | NA           | 1      |
| 168 | USA_INM         | INMMSF                                                          | 39.32 | -86.41  | 286          | 6      |
| 169 | USA_MOR_SF      | Morgan-Monroe State Forest                                      | 39.32 | -86.41  | 275          | 4      |
| 170 | USA_NWH         | NWhiteRiver                                                     | 34.58 | -91.26  | 48           | 2      |
| 171 | USA_ORN_ST1_AMB | ORNL-FACE                                                       | 35.90 | -84.33  | 227          | 1      |
| 172 | USA_ORN_ST2_AMB | ORNL-FACE                                                       | 35.90 | -84.33  | 227          | 1      |
| 173 | USA_ORN_ST3_ELE | ORNL-FACE                                                       | 35.90 | -84.33  | 227          | 1      |
| 174 | USA_ORN_ST4_ELE | ORNL-FACE                                                       | 35.90 | -84.33  | 227          | 1      |
| 175 | USA_PAR_FER     | Parker Tract                                                    | 35.80 | -76.67  | 5            | 1      |
| 176 | USA_PER_PER     | Perry                                                           | 30.21 | -83.87  | 14           | 1      |
| 177 | USA_PJS_P04_AMB | PJSEV -Rainfall Manipulation<br>Experiment - Sevilleta NWR, USA | 34.39 | -106.53 | 1911         | 2      |
| 178 | USA_PJS_P08_AMB | PJSEV -Rainfall Manipulation<br>Experiment - Sevilleta NWR, USA | 34.39 | -106.53 | 1911         | 2      |
| 179 | USA_PJS_P12_AMB | PJSEV -Rainfall Manipulation<br>Experiment - Sevilleta NWR, USA | 34.39 | -106.53 | 1911         | 2      |
| 180 | USA_SIL_OAK_1PR | Silas Little Experimental Forest<br>premortality                | 39.92 | -74.60  | 33           | 4      |
| 181 | USA_SIL_OAK_2PR | Silas Little Experimental Forest<br>premortality                | 39.92 | -74.60  | 33           | 4      |
| 182 | USA_SIL_OAK_POS | Silas Little Experimental Forest<br>premortality                | 39.92 | -74.60  | 33           | 5      |
| 183 | USA_SMI_SCB     | Smithsonian Conservation Biology<br>Insitute                    | 38.89 | -78.15  | 273          | 3      |
| 184 | USA_SMI_SER     | Smithsonian Environmental Research<br>Center                    | 38.89 | -76.56  | 19           | 5      |
| 185 | USA_SWH         | SWhiteRiver                                                     | 34.11 | -91.13  | 44           | 2      |
| 186 | USA_SYL_HL1     | Sylvania Wilderness                                             | 46.24 | -89.35  | 500          | 3      |
| 187 | USA_SYL_HL2     | Sylvania Wilderness                                             | 46.24 | -89.35  | 500          | 4      |
| 188 | USA_TNB         | TNBSF                                                           | 36.47 | -84.70  | 454          | 4      |
| 189 | USA_TNO         | TNOAK                                                           | 35.97 | -84.28  | 340          | 5      |
| 190 | USA_TNP         | TNPINE                                                          | 35.96 | -84.29  | 342          | 5      |
| 191 | USA_TNY         | TNYPOP                                                          | 35.69 | -83.50  | 850          | 3      |
| 192 | USA_UMB_CON     | UMBS                                                            | 45.56 | -84.71  | 236          | 5      |
| 193 | USA_UMB_GIR     | UMB                                                             | 45.56 | -84.70  | 239          | 4      |
| 194 | USA_WIL_WC1     | Willow Creek                                                    | 45.81 | -90.09  | 520          | 5      |
| 195 | USA_WIL_WC2     | Willow Creek                                                    | 45.81 | -90.09  | 520          | 4      |

| #   | Dataset code   | Site name               | Lat.   | Long.  | Elev.<br>(m) | N spp. |
|-----|----------------|-------------------------|--------|--------|--------------|--------|
| 196 | USA_WVF        | WVFEF                   | 39.06  | -79.69 | 844          | 5      |
| 197 | UZB_YAN_DIS    | Yangibazar              | 41.65  | 60.62  | 101          | 2      |
| 198 | ZAF_FRA_FRA    | Franshoek South Africa  | -33.88 | 19.06  | 190          | 1      |
| 199 | ZAF_NOO_E3_IRR | Nooitgedacht farm       | -33.20 | 19.34  | 1089         | 1      |
| 200 | ZAF_RAD        | Radyn EGVV              | -34.08 | 19.11  | 409          | 1      |
| 201 | ZAF_SOU_SOU    | Southfield EGVV         | -34.09 | 19.09  | 389          | 1      |
| 202 | ZAF_WEL_SOR    | Wellington Western Cape | -33.48 | 18.96  | 81           | 1      |

**Table S4.** Number of plants and number of datasets for each species present in the SAPFLUXNET database.

| Species                        | N<br>plant | N<br>data | Species                                     | N<br>plant | N<br>data | Species                              | N<br>plant | N<br>data |
|--------------------------------|------------|-----------|---------------------------------------------|------------|-----------|--------------------------------------|------------|-----------|
| <i>Pinus sylvestris</i>        | 290        | 28        | <i>Acacia tortilis</i>                      | 9          | 3         | <i>Prunus serotina</i>               | 3          | 2         |
| <i>Picea abies</i>             | 178        | 19        | <i>Quercus spp.</i>                         | 9          | 2         | <i>Populus canescens</i>             | 3          | 1         |
| <i>Acer saccharum</i>          | 162        | 9         | <i>Kandelia obovata</i>                     | 8          | 1         | <i>Eucalyptus camaldulensis</i>      | 3          | 1         |
| <i>Fagus sylvatica</i>         | 116        | 16        | <i>Carpinus betulus</i>                     | 8          | 2         | <i>Qualea rosea</i>                  | 3          | 1         |
| <i>Pinus taeda</i>             | 107        | 6         | <i>Castanopsis acuminatissima</i>           | 8          | 1         | <i>Licania alba</i>                  | 3          | 1         |
| <i>Populus tremuloides</i>     | 104        | 1         | <i>Pinus patula</i>                         | 8          | 1         | <i>Eucalyptus dives</i>              | 2          | 1         |
| <i>Pinus koraiensis</i>        | 96         | 3         | <i>Eucalyptus radiata</i>                   | 7          | 5         | <i>Licania octandra</i>              | 2          | 1         |
| <i>Eucalyptus nitens</i>       | 89         | 8         | <i>Betula pubescens subsp. czerepanovii</i> | 7          | 1         | <i>Swartzia racemosa</i>             | 2          | 1         |
| <i>Pinus strobus</i>           | 75         | 5         | <i>Avicennia marina</i>                     | 6          | 1         | <i>Manilkara bidentata</i>           | 2          | 1         |
| <i>Liquidambar styraciflua</i> | 69         | 10        | <i>Quercus robur</i>                        | 6          | 1         | <i>Licania membranacea</i>           | 2          | 2         |
| <i>Quercus ilex</i>            | 62         | 6         | <i>Fraxinus excelsior</i>                   | 6          | 1         | <i>Eschweilera grandiflora</i>       | 2          | 1         |
| <i>Acer rubrum</i>             | 62         | 12        | <i>Cryptocarya laevigata</i>                | 6          | 1         | <i>Pouteria viridis</i>              | 2          | 1         |
| <i>Liriodendron tulipifera</i> | 51         | 11        | <i>Myrtaceae fam.</i>                       | 6          | 1         | <i>Ampelocera macrocarpa</i>         | 2          | 1         |
| <i>Fagus grandifolia</i>       | 48         | 4         | <i>Palaquium luzoniense</i>                 | 6          | 1         | <i>Otoba novogranatensis</i>         | 2          | 1         |
| <i>Pinus resinosa</i>          | 43         | 1         | <i>Platea excelsa</i>                       | 6          | 1         | <i>Mortoniendendron anisophyllum</i> | 2          | 1         |
| <i>Eucalyptus globulus</i>     | 35         | 2         | <i>Pouteria firma</i>                       | 6          | 1         | <i>Meliosma idiopoda</i>             | 2          | 1         |
| <i>Larix decidua</i>           | 34         | 8         | <i>Agathis australis</i>                    | 6          | 1         | <i>Taxus baccata</i>                 | 2          | 1         |
| <i>Abies pinsapo</i>           | 34         | 5         | <i>Ostrya virginiana</i>                    | 6          | 3         | <i>Sloanea sp</i>                    | 2          | 2         |
| <i>Acacia mearnsii</i>         | 33         | 2         | <i>Picea mariana</i>                        | 6          | 1         | <i>Betula sp.</i>                    | 2          | 1         |
| <i>Quercus pyrenaica</i>       | 32         | 2         | <i>Nothofagus pumilio</i>                   | 5          | 1         | <i>Picea glauca</i>                  | 2          | 1         |
| <i>Quercus rubra</i>           | 32         | 6         | <i>Nothofagus cunninghamii</i>              | 5          | 1         | <i>Fraxinus americana</i>            | 2          | 1         |
| <i>Quercus petraea</i>         | 31         | 5         | <i>Eucalyptus cypellocarpa</i>              | 5          | 4         | <i>Carya cordiformis</i>             | 2          | 1         |
| <i>Pseudotsuga menziesii</i>   | 29         | 5         | <i>Eucalyptus rubida</i>                    | 5          | 1         | <i>Quercus prinus</i>                | 2          | 1         |
| <i>Pinus halepensis</i>        | 27         | 2         | <i>Drimys brasiliensis</i>                  | 5          | 1         | <i>Elaeagnus angustifolia</i>        | 2          | 1         |
| <i>Quercus velutina</i>        | 24         | 4         | <i>Alchornea triplinervia</i>               | 5          | 1         | <i>Qualea tricolor</i>               | 2          | 1         |
| <i>Tsuga canadensis</i>        | 24         | 2         | <i>Santiria apiculata</i>                   | 5          | 1         | <i>Lecythis poiteaui</i>             | 2          | 1         |
| <i>Larix cajanderi</i>         | 23         | 2         | <i>Quercus michauxii</i>                    | 5          | 1         | <i>Quercus cerris</i>                | 2          | 1         |
| <i>Betula papyrifera</i>       | 21         | 2         | <i>Quercus phellos</i>                      | 5          | 1         | <i>Pleuranthodendron lindenii</i>    | 1          | 1         |
| <i>Quercus montana</i>         | 21         | 3         | <i>Pinus rigida</i>                         | 5          | 3         | <i>Inga sp.</i>                      | 1          | 1         |
| <i>Quercus pubescens</i>       | 19         | 2         | <i>Tilia americana</i>                      | 5          | 2         | <i>Cupania macrophylla</i>           | 1          | 1         |

| Species                        | N<br>plant | N<br>data | Species                        | N<br>plant | N<br>data | Species                                 | N<br>plant | N<br>data |
|--------------------------------|------------|-----------|--------------------------------|------------|-----------|-----------------------------------------|------------|-----------|
| <i>Abies balsamea</i>          | 19         | 1         | <i>Nothofagus antarctica</i>   | 4          | 1         | <i>Genipa americana</i>                 | 1          | 1         |
| <i>Quercus alba</i>            | 19         | 7         | <i>Eucalyptus baxteri</i>      | 4          | 2         | <i>Brosimum alicastrum</i>              | 1          | 1         |
| <i>Pinus cembra</i>            | 18         | 6         | <i>Coprosma quadrifida</i>     | 4          | 2         | <i>Pouteria sp.</i>                     | 1          | 1         |
| <i>Populus euphratica</i>      | 16         | 6         | <i>Eschweilera coriacea</i>    | 4          | 2         | <i>Macrolobium costaricense</i>         | 1          | 1         |
| <i>Olea europaea</i>           | 16         | 5         | <i>Arbutus unedo</i>           | 4          | 1         | <i>Eschweilera sp.</i>                  | 1          | 1         |
| <i>Quercus rotundifolia</i>    | 16         | 3         | <i>Psiadia altissima</i>       | 4          | 1         | <i>Aspidosperma desmanthum</i>          | 1          | 1         |
| <i>Hevea brasiliensis</i>      | 16         | 2         | <i>Quercus suber</i>           | 4          | 1         | <i>Trophis mexicana</i>                 | 1          | 1         |
| <i>Betula alleghaniensis</i>   | 16         | 2         | <i>Betula pubescens</i>        | 4          | 2         | <i>Betula pendula</i>                   | 1          | 1         |
| <i>Pinus nigra</i>             | 15         | 3         | <i>Fraxinus pennsylvanica</i>  | 4          | 2         | <i>Iryanthera sagotiana</i>             | 1          | 1         |
| <i>Picea sitchensis</i>        | 15         | 1         | <i>Pouteria anomala</i>        | 3          | 1         | <i>Vantanea sp</i>                      | 1          | 1         |
| <i>Pinus edulis</i>            | 15         | 3         | <i>Protium tenuifolium</i>     | 3          | 1         | <i>Recordoxylon speciosum</i>           | 1          | 1         |
| <i>Juniperus monosperma</i>    | 15         | 3         | <i>Hieronyma alchorneoides</i> | 3          | 1         | <i>Larix kaempferi x Larix gmelinii</i> | 1          | 1         |
| <i>Eucalyptus victrix</i>      | 14         | 1         | <i>Mollinedia schottiana</i>   | 3          | 1         | <i>Cryptomeria japonica</i>             | 1          | 1         |
| <i>Eucalyptus obliqua</i>      | 14         | 5         | <i>Rustia formosa</i>          | 3          | 1         | <i>Eugenia spp.</i>                     | 1          | 1         |
| <i>Quercus lyrata</i>          | 13         | 2         | <i>Theobroma cacao</i>         | 3          | 1         | <i>Ocotea samosa</i>                    | 1          | 1         |
| <i>Celtis laevigata</i>        | 13         | 2         | <i>Carapa guianensis</i>       | 3          | 1         | <i>Leptolaena sp.</i>                   | 1          | 1         |
| <i>Quercus coccinea</i>        | 13         | 4         | <i>Gymnanthes riparia</i>      | 3          | 1         | <i>Abrahamia ditimena</i>               | 1          | 1         |
| <i>Populus grandidentata</i>   | 12         | 1         | <i>Ilex aquifolium</i>         | 3          | 1         | <i>Brachylaena ramiflora</i>            | 1          | 1         |
| <i>Malus domestica</i>         | 11         | 3         | <i>Vouacapoua americana</i>    | 3          | 3         | <i>Cryptocarya sp.</i>                  | 1          | 1         |
| <i>Eucalyptus tereticornis</i> | 10         | 1         | <i>Oxandra asbeckii</i>        | 3          | 2         | <i>Saurauia pedunculata</i>             | 1          | 1         |
| <i>Quercus faginea</i>         | 10         | 2         | <i>Goupia glabra</i>           | 3          | 3         | <i>Turpinia insignis</i>                | 1          | 1         |
| <i>Pinus canariensis</i>       | 10         | 1         | <i>Vernonia arborea</i>        | 3          | 1         | <i>Sassafras albidum</i>                | 1          | 1         |
| <i>Elaeis guineensis</i>       | 10         | 1         | <i>Platanus mexicana</i>       | 3          | 1         | <i>Ulmus americana</i>                  | 1          | 1         |
| <i>Acacia longifolia</i>       | 10         | 1         | <i>Clethra macrophylla</i>     | 3          | 2         | <i>Carya glabra</i>                     | 1          | 1         |
| <i>Pinus pinaster</i>          | 10         | 1         | <i>Larix sibirica</i>          | 3          | 1         | <i>Quercus falcata</i>                  | 1          | 1         |
| <i>Thuja occidentalis</i>      | 10         | 1         | <i>Larix gmelinii</i>          | 3          | 1         | <i>Cornus florida</i>                   | 1          | 1         |
| <i>Carya tomentosa</i>         | 10         | 2         | <i>Pinus sibirica</i>          | 3          | 1         | <i>Licania rodriguesii</i>              | 1          | 1         |
| <i>Dicorynia guianensis</i>    | 9          | 2         | <i>Pinus virginiana</i>        | 3          | 1         | <i>Sextonia rubra</i>                   | 1          | 1         |

**Table S5.** Number of plants per genus present in the SAPFLUXNET database.

| <b>Genus</b>        | <b>N plants</b> | <b>Genus</b>          | <b>N plants</b> | <b>Genus</b>             | <b>N plants</b> |
|---------------------|-----------------|-----------------------|-----------------|--------------------------|-----------------|
| <i>Pinus</i>        | 725             | <i>Cryptocarya</i>    | 7               | <i>Ampelocera</i>        | 2               |
| <i>Quercus</i>      | 326             | <i>Avicennia</i>      | 6               | <i>Otoba</i>             | 2               |
| <i>Acer</i>         | 224             | <i>Myrtaceae fam.</i> | 6               | <i>Mortoniendron</i>     | 2               |
| <i>Picea</i>        | 201             | <i>Palaquium</i>      | 6               | <i>Meliosma</i>          | 2               |
| <i>Eucalyptus</i>   | 188             | <i>Platea</i>         | 6               | <i>Taxus</i>             | 2               |
| <i>Fagus</i>        | 164             | <i>Agathis</i>        | 6               | <i>Sloanea</i>           | 2               |
| <i>Populus</i>      | 135             | <i>Ostrya</i>         | 6               | <i>Elaeagnus</i>         | 2               |
| <i>Liquidambar</i>  | 69              | <i>Drimys</i>         | 5               | <i>Lecythis</i>          | 2               |
| <i>Larix</i>        | 64              | <i>Alchornea</i>      | 5               | <i>Pleuranthodendron</i> | 1               |
| <i>Abies</i>        | 53              | <i>Santiria</i>       | 5               | <i>Inga</i>              | 1               |
| <i>Acacia</i>       | 52              | <i>Tilia</i>          | 5               | <i>Cupania</i>           | 1               |
| <i>Betula</i>       | 51              | <i>Qualea</i>         | 5               | <i>Genipa</i>            | 1               |
| <i>Liriodendron</i> | 51              | <i>Coprosma</i>       | 4               | <i>Brosimum</i>          | 1               |
| <i>Pseudotsuga</i>  | 29              | <i>Arbutus</i>        | 4               | <i>Macrolobium</i>       | 1               |
| <i>Tsuga</i>        | 24              | <i>Psiadia</i>        | 4               | <i>Aspidosperma</i>      | 1               |
| <i>Olea</i>         | 16              | <i>Protium</i>        | 3               | <i>Trophis</i>           | 1               |
| <i>Hevea</i>        | 16              | <i>Hieronyma</i>      | 3               | <i>Iryanthera</i>        | 1               |
| <i>Juniperus</i>    | 15              | <i>Mollinedia</i>     | 3               | <i>Vantanea</i>          | 1               |
| <i>Nothofagus</i>   | 14              | <i>Rustia</i>         | 3               | <i>Recordoxylon</i>      | 1               |
| <i>Carya</i>        | 13              | <i>Theobroma</i>      | 3               | <i>Cryptomeria</i>       | 1               |
| <i>Celtis</i>       | 13              | <i>Carapa</i>         | 3               | <i>Eugenia</i>           | 1               |
| <i>Pouteria</i>     | 12              | <i>Gymnanthes</i>     | 3               | <i>Ocotea</i>            | 1               |
| <i>Fraxinus</i>     | 12              | <i>Ilex</i>           | 3               | <i>Leptolaena</i>        | 1               |
| <i>Malus</i>        | 11              | <i>Vouacapoua</i>     | 3               | <i>Abrahamia</i>         | 1               |
| <i>Elaeis</i>       | 10              | <i>Oxandra</i>        | 3               | <i>Brachylaena</i>       | 1               |
| <i>Thuja</i>        | 10              | <i>Goupia</i>         | 3               | <i>Saurauia</i>          | 1               |
| <i>Dicorynia</i>    | 9               | <i>Vernonia</i>       | 3               | <i>Turpinia</i>          | 1               |
| <i>Licania</i>      | 8               | <i>Platanus</i>       | 3               | <i>Sassafras</i>         | 1               |
| <i>Kandelia</i>     | 8               | <i>Clethra</i>        | 3               | <i>Ulmus</i>             | 1               |
| <i>Carpinus</i>     | 8               | <i>Prunus</i>         | 3               | <i>Cornus</i>            | 1               |
| <i>Castanopsis</i>  | 8               | <i>Swartzia</i>       | 2               | <i>Sextonia</i>          | 1               |
| <i>Eschweilera</i>  | 7               | <i>Manilkara</i>      | 2               |                          |                 |

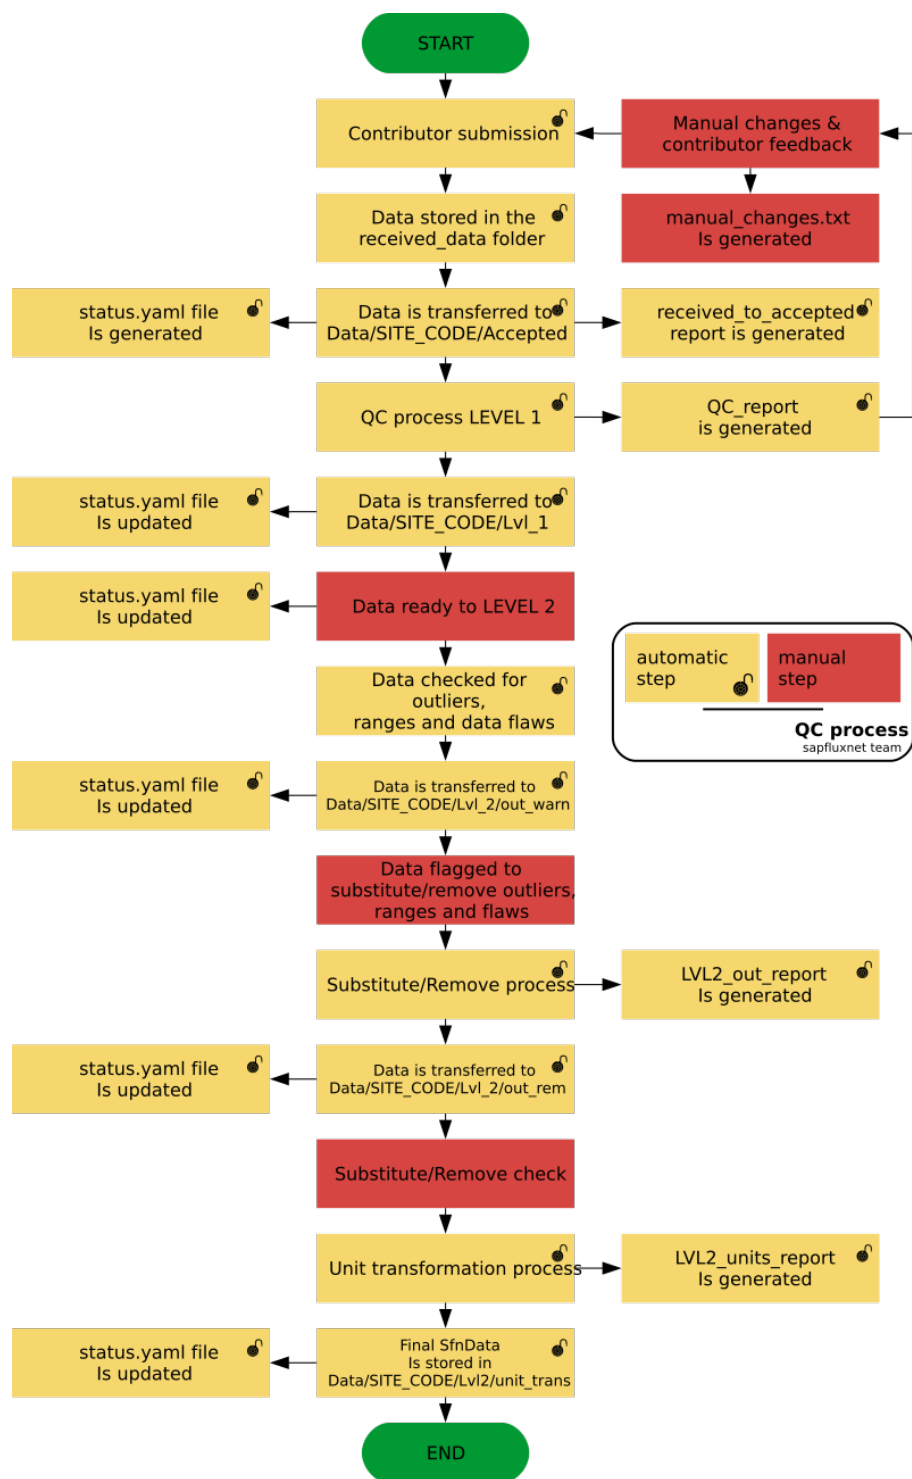

Figure S1. Overview of the data QC process, showing file management and identifying automatic (in yellow) and manual steps (in red). The column on the left shows the different updates of the status file for each dataset and the column on the right shows generated data reports and steps requiring feedback or manual changes.

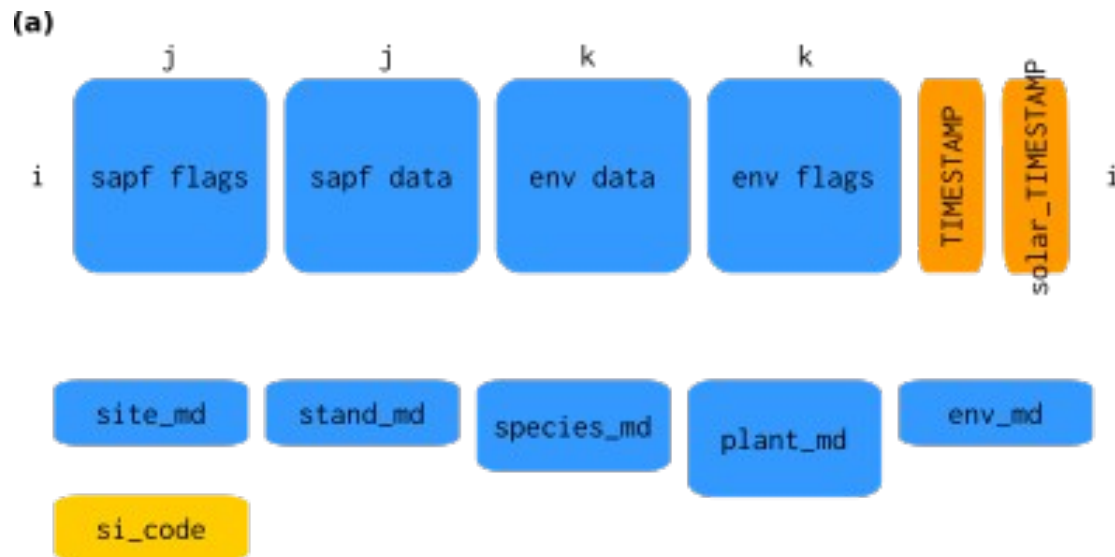

(b)

```
> NLD_L00
sfn_data object
Data from NLD_L00 site

Data kindly provided by Jan Elbers from Alterra, Wageningen UR
Site related literature: 10.1016/j.agrformet.2011.07.020
Sapflow data: 70128 observations of 6 trees/plants
Species present: Pinus sylvestris

Environmental data: 70128 observations.
Variables present:
  ta rh sw_in ppfd_in netrad ws precip swc_shallow swc_deep
vpd ext_rad

Biome: Mediterranean

TIMESTAMP span: 2012-01-01 00:30:00 +01--2016-01-01 +01
Solar TIMESTAMP span: 2011-12-31 23:48:56 UTC--2015-12-31 23:18:56 UTC

Sapflow data flags:
MANUAL_REMOVED   OUT_WARN   NA_PRESENT
          370         29186         83613

Environmental data flags:
RANGE_WARN MANUAL_REMOVED   NA_PRESENT   OUT_WARN   CALCULATED
          1           558         9469         51780         140256
```

Figure S2. (a) Structure of `sfn_data` objects, which are based on the S4 class. Boxes in the figure represent different slots where data are stored. Each object is identified by the 'si\_code', stored as a slot in the object, with the format of a character vector. Slots storing time series of data and the associated data flags are of

class 'tibble' and have all the same number of rows ( $i$ ), corresponding to the the number of timesteps in the dataset and labelled with two POSIXct timestamp vectors (TIMESTAMP, solar\_TIMESTAMP). The slot storing sap flow data, 'sapf\_data' contains ( $j$ ) columns and environmental data ('env\_data') contains  $k$  columns, corresponding to the number of environmental variables present. Slots with the suffix 'md' refer to the different metadata and all are objects of class 'tibble' with different dimensions. For example, the number of rows in 'plant\_md' depends on the number of plants in the dataset (and this is depicted by the different length of the box). More information on the 'sfn\_data' class objects can be found in the vignette 'sfn-data-classes' of the package sapfluxnetr. (b) Summary of a sfn\_data object, showing highlights of site metadata, data dimensions, timestamp span and flags present on the data.

Outliers, ranges and flaw values flagging

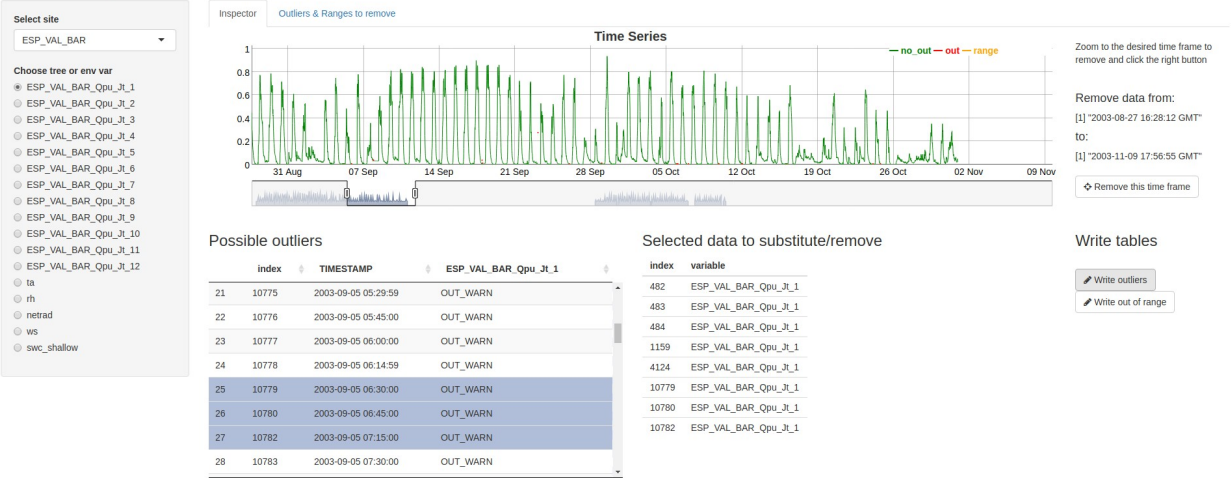

**Figure S3. Example screenshot of the app used for handling outliers and out of range values in time series. The left column shows dataset and variable selection. The central part shows the time series, with out of range values in red and possible outliers in yellow. Rows to replace or remove are selected in a table and written to a text file when done.**

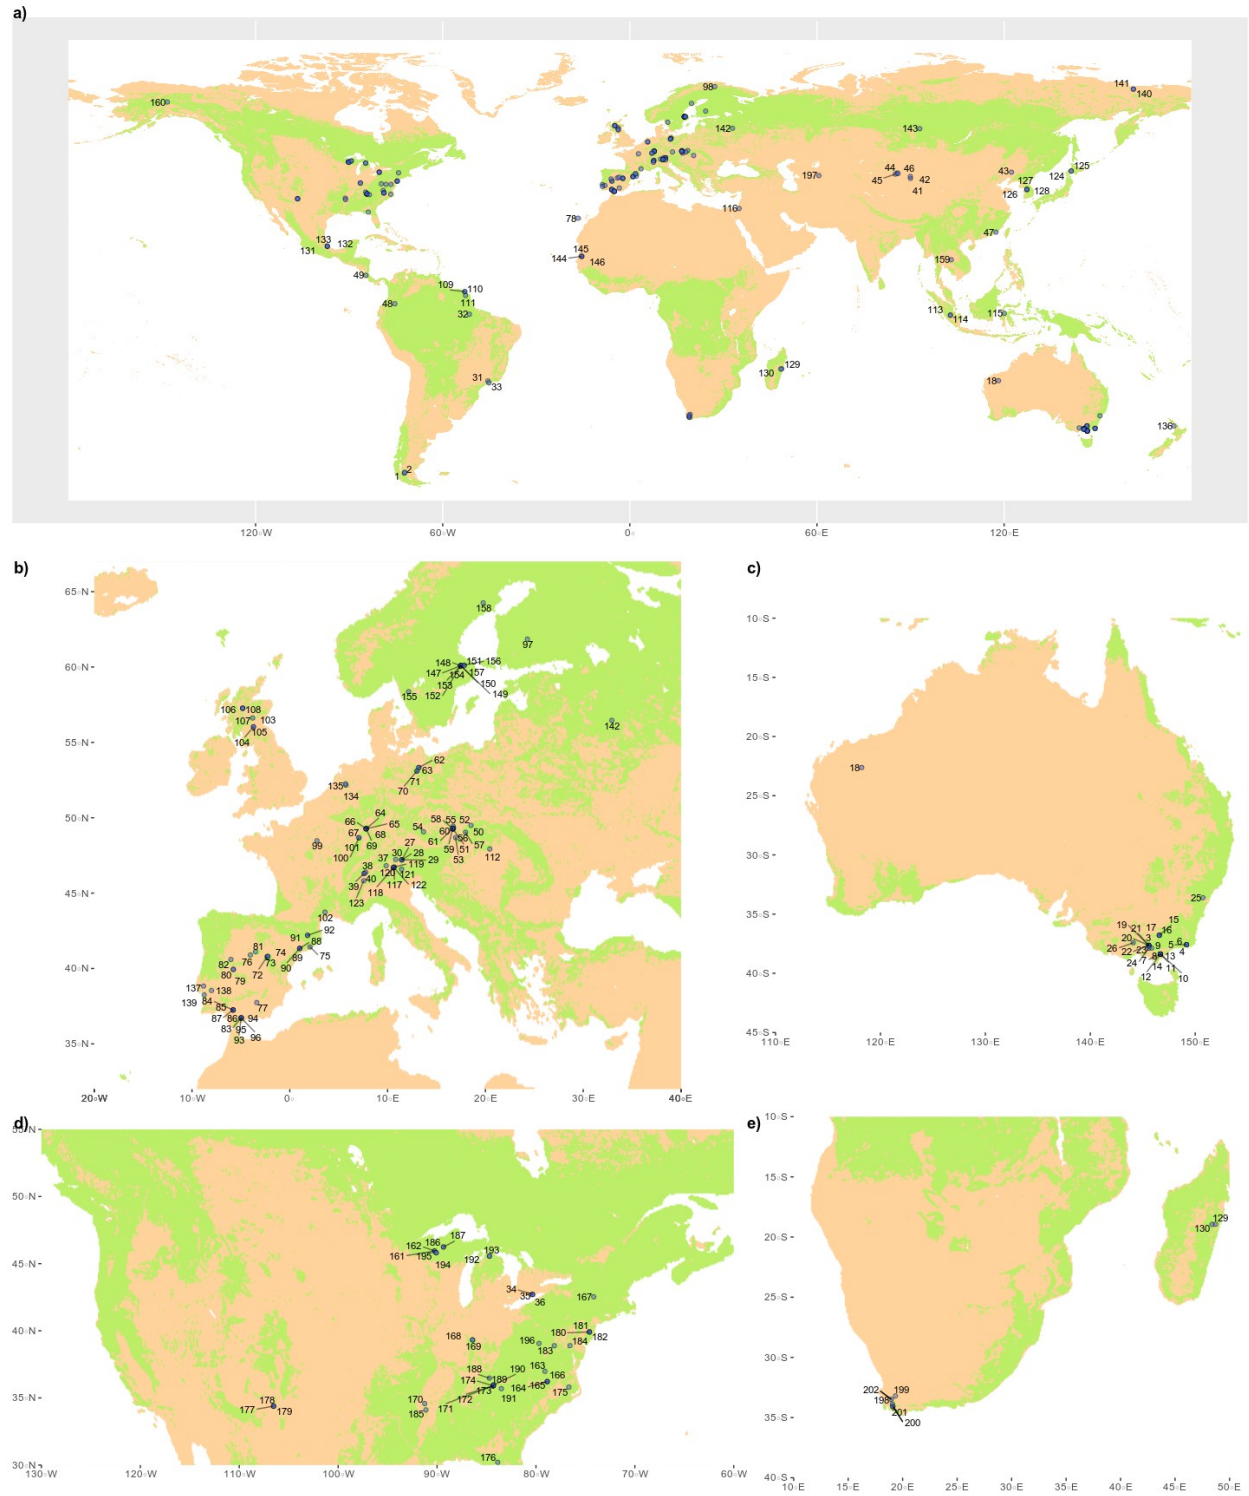

**Figure S4. Detailed geographic distribution of SAPFLUXNET datasets. Datasets are labelled by dataset number in Table S8. Woodland area from Crowther et al. (2015) shown in green.**
