# Supplementary material for: Global transpiration data from sap flow measurements: theSAPFLUXNET database
Source: Copernicus journal article supplement (doi:10.5194/essd-2020-227), 2020-10-09
Supplement: Supplementary file 1 [file sapfluxnet_metadata_template.xlsx]

## Sheet: site_md
__metadata.xlsx
Variable	Description	Units	Value		Instructions:
si_name	Site name	free text			1. Fill in each variable with the required information (leave blank if no information is available for that variable)
si_country	Country name (ISO 3166-1 Code)	CLICK HERE to see DICTIONARY			a) For each variable, place the cursor on the corresponding cell in the 'Value' column. Some cells will display a help box with additional information.
si_contact_firstname	Data contributor first name. This person will be the contact person for communication with the sapfluxnet team	free text			b) Type the value of the variable or select from the droplist (click on the icon with an inverted triangle) that will appear after you place the cursor in the cell.
si_contact_lastname	Data contributor last name. This person will be the contact person for communication with the sapfluxnet team	free text			c) For further descriptions of the values in the droplists, please go to the corresponding DICTIONARY sheet, labelled with '_dic' (e.g. 'site_dic') or follow the link in the 'Units' column.
si_contact_email	Data contributor email. This person will be the contact person for communication with the sapfluxnet team	free text			2. Go to the stand_md sheet
si_contact_institution	Data contributor institution. This person will be the contact person for communication with the sapfluxnet team	free text
si_addcontr_firstname	Additional data contributor first name. Fill in only if more than one data contributor should be acknowledged	free text
si_addcontr_lastname	Additional data contributor last name. Fill in only if more than one data contributor should be acknowledged	free text
si_addcontr_email	Additional data contributor email. Fill in only if more than one data contributor should be acknowledged	free text
si_addcontr_institution	Additional data contributor institution. Fill in only if more than one data contributor should be acknowledged	free text
si_lat	Latitude of the site in decimal format. CLICK HERE for a a degree, minutes,seconds → decimal converter	decimal deg ref WGS84
si_long	Longitude of the site in decimal format. CLICK HERE for a a degree, minutes,seconds → decimal converter	decimal deg ref WGS84
si_elev	Elevation of the site above sea level	m
si_igbp	Vegetation type based on the IGBP definition. Select from list	CLICK HERE to see DICTIONARY
si_paper	Paper with relevant information to understand the site and the experimental methods employed	DOI (Digital Object Identifier)
si_dist_mgmt	Recent and historic disturbance and management events that affect the site years of measurement. Select from list	CLICK HERE to see DICTIONARY
si_flux_network	Does the site participate in the FLUXNET network?	boolean
si_dendro_network	Does the site participate in the DENDROGLOBAL network?	boolean
si_remarks	Remarks that may be useful to grasp some site-specific peculiarities that may not have been adequately captured by the site-level metadata	free text
si_code	Internal code, automatically created after form is completed	Automatic text	_

## Sheet: stand_md
Variable	Description	Units	Value
st_name	Identification of the stand. Useful to distinguish between different stands in the same site	free text			Instructions:
st_growth_condition	Growth condition with respect to stand origin and management	CLICK HERE to see DICTIONARY			1. Fill in each variable with the required information (leave blank if no information is available for that variable)
st_treatment	Treatment applied at the stand level (e.g. drought)	free text			a) For each variable, place the cursor on the corresponding cell in the 'Value' column. Some cells will display a help box with additional information.
st_age	Mean stand age at the time the sap flow measurements were taken	years			b) Type the value of the variable or select from the droplist (click on the icon with an inverted triangle) that will appear after you place the cursor in the cell.
st_height	Canopy height	m			c) For further descriptions of the values in the droplists, please go to the corresponding DICTIONARY sheet, labelled with '_dic' (e.g. 'stand_and_species_dic') or follow the link in the 'Units' column.
st_density	Total stem density	stems/ha			2. Go to the species_md sheet
st_basal_area	Total stand basal area	m2/ha
st_lai	Total maximum stand leaf area (one-sided, projected)	m2/m2
st_aspect	Direction the site is facing (Exposure)	CLICK HERE to see DICTIONARY
st_terrain	Slope and/or relief of the site	CLICK HERE to see DICTIONARY
st_soil_depth	Soil depth	cm
st_soil_texture	Soil texture class	CLICK HERE to see DICTIONARY
st_sand_perc	Sand content. % mass	%
st_silt_perc	Silt content. % mass	%
st_clay_perc	Clay content. % mass	%
st_remarks	Remarks that may be useful to grasp some stand-specific peculiarities that may not have been adequately captured by the stand-level metadata	free text

## Sheet: species_md
Variable	Description	Units	1	2	3	4	5	6	7	8	9	10	11	12	13	14	15	16	17	18	19	20	21	22	23	24	25	26	27	28	29	30	31	32	33	34	35	36	37	38	39	40	41	42	43	44	45	46	47
sp_name	Identity of each measured species	Scientific name
sp_ntrees	Number of trees measured of each species	Integer
sp_leaf_habit	Leaf habit of the measured species	CLICK HERE to see DICTIONARY
sp_basal_area_perc	Basal areal, in percentage over total stand basal area, occupied by each species	%
	Instructions:
	1. Fill in each variable with the required information (leave blank if no information is available for that variable)
	a) For each variable, place the cursor on the corresponding cell in the 'Value' column. Some cells will display a help box with additional information.
	b) Type the value of the variable or select from the droplist (click on the icon with an inverted triangle) that will appear after you place the cursor in the cell.
	c) For further descriptions of the values in the droplists, please go to the corresponding DICTIONARY sheet, labelled with '_dic' (e.g. 'stand_and_species_dic') or follow the link in the 'Units' column.
	2. If in need of more columns, expand to the right to the desired number of colums
	3. Go to the plant_md sheet
[truncated: 3 more columns]

## Sheet: plant_md
Variable	Description	Units	1	2	3	4	5	6	7	8	9	10	11	12	13	14	15	16	17	18	19	20	21	22	23	24	25	26	27	28	29	30	31	32	33	34	35	36	37	38	39	40	41	42	43	44	45	46	47
pl_name	Plant name assigned by data contributor	free text
pl_species	Species identity of the measured tree	Scientific name
pl_treatment	Experimental treatment (if any). Leave blank if no treatments were applied	free text
pl_dbh	Diameter at breast height	cm
pl_height	Plant height	m
pl_age	Plant age	years
pl_social	Plant social status	CLICK HERE to see DICTIONARY
pl_sapw_area	Plant cross-sectional sapwood area	cm²
pl_sapw_depth	Sapwood depth, measured at breast height	cm
pl_bark_thick	Plant bark thickness	mm
pl_leaf_area	Plant leaf area	m²
pl_sens_meth	Sap flow method	CLICK HERE to see DICTIONARY
pl_sens_man	Sensor manufacturer	CLICK HERE to see DICTIONARY
pl_sens_cor_grad	Values corrected for natural gradients within the stem?	CLICK HERE to see DICTIONARY
pl_sens_cor_zero	Method of determination of zero flow	CLICK HERE to see DICTIONARY
pl_sens_calib	Species-specific calibration used	CLICK HERE to see DICTIONARY
pl_sap_units	Units to express sap flow per individual plant or per sapwood area	CLICK HERE to see DICTIONARY
pl_sens_length	Length of the needles or electrodes forming the sensor, over which sap flow is measured	mm
pl_sens_hgt	Sensor installation height, measured from the ground	m
pl_sens_timestep	Time step of sensor measures	min
pl_radial_int	Procedure for radial integration of whole-plant sap flow	CLICK HERE to see DICTIONARY
pl_azimut_int	Procedure for azimuthal integration of whole-plant sap flow	CLICK HERE to see DICTIONARY
pl_remarks	Remarks that may be useful to grasp some plant-specific peculiarities that may not have been adequately captured by the stite level metadata	free text
pl_code	Internal code, automatically created after form is completed	Automatic text
	Instructions:			3. If in need of more columns, expand to the right to the desired number of colums	4. Go to the environmental_md sheet
	1. IMPORTANT: check your sap flow time series data first, and introduce the plant metadata in the same order as the columns in your data files. This way, you will be able to use the automatically created headers in the 'sapflow_hd' sheet in this file to identify each tree in the sap flow data file.	2. Fill in each variable with the required information (leave blank if no information is available for that variable)
		a) For each variable, place the cursor on the corresponding cell in the 'Value' column. Some cells will display a help box with additional information.
		b) Type the value of the variable or select from the droplist (click on the icon with an inverted triangle) that will appear after you place the cursor in the cell.
		c) For further descriptions of the values in the droplists, please go to the corresponding DICTIONARY sheet, labelled with '_dic' (e.g. 'plant_dic') or follow the link in the 'Units' column.
[truncated: 53 more columns]

## Sheet: environmental_md
Variable	Description	Units	Value
env_time_zone	Time zone used in timestsamps	CLICK HERE to see DICTIONARY			Instructions:
env_time_daylight	How do the time series deal with daylight saving time? Timestamp tracks daylight saving time?	boolean			1. Fill in each variable with the required information (leave blank if no information is available for that variable)
env_timestep	Time step of environmental measures	min			a) For each variable, place the cursor on the corresponding cell in the 'Value' column. Some cells will display a help box with additional information.
env_ta	Air temperature. Specify the location of the sensor in the canopy	CLICK HERE to see DICTIONARY			b) Type the value of the variable or select from the droplist (click on the icon with an inverted triangle) that will appear after you place the cursor in the cell.
env_rh	Air relative humidity. Specify the location of the sensor in the canopy	CLICK HERE to see DICTIONARY			c) For further descriptions of the values in the droplists, please go to the corresponding DICTIONARY sheet, labelled with '_dic' (e.g. 'stand_and_species_dic') or follow the link in the 'Units' column.
env_vpd	Air vapour pressure deficit. Specify the location of the sensor in the canopy	CLICK HERE to see DICTIONARY			d) Subdaily environmental data with the same timestep as sapflow data is prefered. In the case of subdaily data not available, daily aggregates can be provided but it must be indicated in the remarks field
env_sw_in	Shortwave incoming radiation. Specify the location of the sensor in the canopy	CLICK HERE to see DICTIONARY			2. Headers for Sapflow and Environmental data have been created at sapflow_hd and environmental_hd sheets.
env_ppfd_in	Incoming photosynthetic photon flux density. Specify the location of the sensor in the canopy	CLICK HERE to see DICTIONARY			a) Paste your data time series below the headers, using one of the timestamp formats allowed.
env_netrad	Net radiation. Specify the location of the sensor in the canopy	CLICK HERE to see DICTIONARY			b) Gaps in the data time series are allowed, but please try to avoid jumps in the timestamps (i.e. one row 01/03/2016 15:00 and the following 01/03/2016 20:00).
env_ws	Wind speed. Specify the location of the sensor in the canopy	CLICK HERE to see DICTIONARY			3. Preferently, sap flow and environmental data sheets must be saved as separate .csv files and named according to the instructions in '_hd' sheets. Alternatively, we also accept sap flow and environmental data in the two sheets provided in this workbook.
env_precip	Precipitation. Specify the location of the sensor in the canopy	CLICK HERE to see DICTIONARY			4. If you are finished introducing the metadata, save the excel file with the name automatically generated (see below):
env_swc_shallow_depth	Depth for shallow soil water content measurements	cm			__metadata.xlsx
env_swc_deep_depth	Depth for deep soil water content measurements	cm			4. Go to sapflow_hd sheet
env_plant_watpot	Are data for plant water potentials available for the same measured trees or at least in the same stand during the sap flow monitoring period?	CLICK HERE to see DICTIONARY
env_leafarea_seasonal	Are data for seasonal course of leaf area available? Specifiy if data is stand-, species- or tree-level	CLICK HERE to see DICTIONARY
env_remarks	Remarks that may be useful to grasp some plant-specific peculiarities that may not have been adequately captured by the tree level metadata	free text

## Sheet: sapflow_hd
1. Fill in the data and save the sheet as csv with the automatically generated name (see below):	1	2	3	4	5	6	7	8	9	10	11	12	13	14	15	16	17	18	19	20	21	22	23	24	25	26	27	28	29	30	31	32	33	34	35	36	37	38	39	40	41	42	43	44	45	46	47	48	49
__sapflow_data.csv	Plant code	Plant code	Plant code	Plant code	Plant code	Plant code	Plant code	Plant code	Plant code	Plant code	Plant code	Plant code	Plant code	Plant code	Plant code	Plant code	Plant code	Plant code	Plant code	Plant code	Plant code	Plant code	Plant code	Plant code	Plant code	Plant code	Plant code	Plant code	Plant code	Plant code	Plant code	Plant code	Plant code	Plant code	Plant code	Plant code	Plant code	Plant code	Plant code	Plant code	Plant code	Plant code	Plant code	Plant code	Plant code	Plant code	Plant code	Plant code	Plant code
2. Accepted timestamp formats are: YYYY/MM/DD HH:MM:SS and DD/MM/YYYY HH:MM:SS	Units	Units	Units	Units	Units	Units	Units	Units	Units	Units	Units	Units	Units	Units	Units	Units	Units	Units	Units	Units	Units	Units	Units	Units	Units	Units	Units	Units	Units	Units	Units	Units	Units	Units	Units	Units	Units	Units	Units	Units	Units	Units	Units	Units	Units	Units	Units	Units	Units
3. Continue to environmental_hd sheet	Variable	Variable	Variable	Variable	Variable	Variable	Variable	Variable	Variable	Variable	Variable	Variable	Variable	Variable	Variable	Variable	Variable	Variable	Variable	Variable	Variable	Variable	Variable	Variable	Variable	Variable	Variable	Variable	Variable	Variable	Variable	Variable	Variable	Variable	Variable	Variable	Variable	Variable	Variable	Variable	Variable	Variable	Variable	Variable	Variable	Variable	Variable	Variable	Variable
TIMESTAMP	Plant full code	Plant full code	Plant full code	Plant full code	Plant full code	Plant full code	Plant full code	Plant full code	Plant full code	Plant full code	Plant full code	Plant full code	Plant full code	Plant full code	Plant full code	Plant full code	Plant full code	Plant full code	Plant full code	Plant full code	Plant full code	Plant full code	Plant full code	Plant full code	Plant full code	Plant full code	Plant full code	Plant full code	Plant full code	Plant full code	Plant full code	Plant full code	Plant full code	Plant full code	Plant full code	Plant full code	Plant full code	Plant full code	Plant full code	Plant full code	Plant full code	Plant full code	Plant full code	Plant full code	Plant full code	Plant full code	Plant full code	Plant full code	Plant full code
[truncated: 51 more columns]

## Sheet: environmental_hd
1. Fill in the data and save the sheet as csv with the automatically generated name (see below):
__env_data.csv
2. Accepted timestamp formats are: YYYY/MM/DD HH:MM:SS and DD/MM/YYYY HH:MM:SS
TIMESTAMP	ta	rh	vpd	sw_in	ppfd_in	netrad	ws	precip

## Sheet: site_dic
country value	country description	IGBP_value	IGBP_description	dist_mgmt value	dist_mgmt description	network_value	network_description
AFG	Afghanistan	BSV	Barren Sparse Vegetation: Lands exposed soil, sand, or rocks and has less than 10% vegetative cover during any time of the year.	Agriculture	Agricultural management of any kind, such as cultivation (including tillage, plowing, or discing), harvest, irrigation, pesticides, planting, or liming.	TRUE	site participates in a data network (FLUXNET or DENDROGLOBAL).
ALA	Åland Islands	CRO	Croplands: Lands covered with temporary crops followed by harvest and a bare soil period (e.g., single and multiple cropping systems). Note that perennial woody crops will be classified as the appropriate forest or shrub land cover type.	Drought	Prolonged water deficiency; hydrologic or climatic drought.	FALSE	site does not participates in a data network (FLUXNET or DENDROGLOBAL).
ALB	Albania	CSH	Closed Shrublands: Lands with woody vegetation less than 2 meters tall and with shrub canopy cover >60%. The shrub foliage can be either evergreen or deciduous.	Fire	Wildfire or managed burns.
DZA	Algeria	CVM	Cropland/Natural Vegetation Mosaics: Lands with a mosaic of croplands, forest, shrublands, and grasslands in which no one component comprises more than 60% of the landscape.	Forestry	Forest management such as logging of any kind, plantation planting, or herbicide application.
ASM	American Samoa	DBF	Deciduous Broadleaf Forests: Lands dominated by woody vegetation with a percent cover >60% and height exceeding 2 meters. Consists of broadleaf tree communities with an annual cycle of leaf-on and leaf-off periods.	Grazing	Herbivory or browsing by mammals, managed or wild.
AND	Andorra	DNF	Deciduous Needleleaf Forests: Lands dominated by woody vegetation with a percent cover >60% and height exceeding 2 meters. Consists of seasonal needleleaf tree communities with an annual cycle of leaf-on and leaf-off periods.	Hydrologic event	Drainage, persistent flooding, or chronic flooding. Does not include storm events or irrigation					Lat/long converter from DMS (degrees, minutes, seconds) to decimal
AGO	Angola	EBF	Evergreen Broadleaf Forests: Lands dominated by woody vegetation with a percent cover >60% and height exceeding 2 meters. Almost all trees and shrubs remain green year round. Canopy is never without green foliage.	Land cover change	Land use and land cover change; invasion; woody or urban encroachment.					Insert degrees, minutes and seconds separately in the cells below to obtain the lat/lon in decimal format. Follow the sign conventions in the figure above.			Lat/lon in decimal format
AIA	Anguilla	ENF	Evergreen Needleleaf Forests: Lands dominated by woody vegetation with a percent cover >60% and height exceeding 2 meters. Almost all trees remain green all year. Canopy is never without green foliage.	Pests and disease	Plant or soil damage from pests, insects, pathogens, blight, and other disease.					Degrees	Minutes	Seconds	Decimal
ATA	Antarctica	MF	Mixed Forests: Lands dominated by trees with a percent cover >60% and height exceeding 2 meters. Consists of tree communities with interspersed mixtures or mosaics of the other four forest types. None of the forest types exceeds 60% of landscape.	NULL	Not applicable.				Latitude				0
ATG	Antigua and Barbuda	OSH	Open Shrublands: Lands with woody vegetation less than 2 meters tall and with shrub canopy cover between 10-60%. The shrub foliage can be either evergreen or deciduous.						Longitude				0
ARG	Argentina	SAV	Savannas: Lands with herbaceous and other understory systems, and with forest canopy cover between 10-30%. The forest cover height exceeds 2 meters.
ARM	Armenia	URB	Urban and Built-Up Lands: Land covered by buildings and other man-made structures.
ABW	Aruba	WET	Permanent Wetlands: Lands with a permanent mixture of water and herbaceous or woody vegetation that cover extensive areas. The vegetation can be present in either salt, brackish, or fresh water.
AUS	Australia	WSA	Woody Savannas: Lands with herbaceous and other understory systems, and with forest canopy cover between 30-60%. The forest cover height exceeds 2 meters.
AUT	Austria
AZE	Azerbaijan
BHS	Bahamas
BHR	Bahrain
BGD	Bangladesh
BRB	Barbados
BLR	Belarus
BEL	Belgium
BLZ	Belize
BEN	Benin
BMU	Bermuda
BTN	Bhutan
BOL	Bolivia (Plurinational State of)
BES	Bonaire, Sint Eustatius and Saba
BIH	Bosnia and Herzegovina
BWA	Botswana
BVT	Bouvet Island
BRA	Brazil
IOT	British Indian Ocean Territory
BRN	Brunei Darussalam
BGR	Bulgaria
BFA	Burkina Faso
BDI	Burundi
CPV	Cabo Verde
KHM	Cambodia
CMR	Cameroon
CAN	Canada
CYM	Cayman Islands
CAF	Central African Republic
TCD	Chad
CHL	Chile
CHN	China
CXR	Christmas Island
CCK	Cocos (Keeling) Islands
COL	Colombia
COM	Comoros
COG	Congo
COD	Congo (Democratic Republic of the)
COK	Cook Islands
CRI	Costa Rica
CIV	Côte d'Ivoire
HRV	Croatia
CUB	Cuba
CUW	Curaçao
CYP	Cyprus
CZE	Czech Republic
DNK	Denmark
DJI	Djibouti
DMA	Dominica
DOM	Dominican Republic
ECU	Ecuador
EGY	Egypt
SLV	El Salvador
GNQ	Equatorial Guinea
ERI	Eritrea
EST	Estonia
ETH	Ethiopia
FLK	Falkland Islands
FRO	Faroe Islands
FJI	Fiji
FIN	Finland
FRA	France
GUF	French Guiana
PYF	French Polynesia
ATF	French Southern Territories
GAB	Gabon
GMB	Gambia
GEO	Georgia
DEU	Germany
GHA	Ghana
GIB	Gibraltar
GRC	Greece
GRL	Greenland
GRD	Grenada
GLP	Guadeloupe
GUM	Guam
GTM	Guatemala
GGY	Guernsey
GIN	Guinea
GNB	Guinea-Bissau
GUY	Guyana
HTI	Haiti
HMD	Heard Island and McDonald Islands
VAT	Holy See
HND	Honduras
HKG	Hong Kong
HUN	Hungary
ISL	Iceland
IND	India
IDN	Indonesia
IRN	Iran (Islamic Republic of)
IRQ	Iraq
IRL	Ireland
IMN	Isle of Man
ISR	Israel
ITA	Italy
JAM	Jamaica
JPN	Japan
JEY	Jersey
JOR	Jordan
KAZ	Kazakhstan
KEN	Kenya
KIR	Kiribati
PRK	Korea (Democratic People's Republic of)
KOR	Korea (Republic of)
KWT	Kuwait
KGZ	Kyrgyzstan
LAO	Lao People's Democratic Republic
LVA	Latvia
LBN	Lebanon
LSO	Lesotho
LBR	Liberia
LBY	Libya
LIE	Liechtenstein
LTU	Lithuania
LUX	Luxembourg
MAC	Macao
MKD	Macedonia (the former Yugoslav Republic of)
MDG	Madagascar
MWI	Malawi
MYS	Malaysia
MDV	Maldives
MLI	Mali
MLT	Malta
MHL	Marshall Islands
MTQ	Martinique
MRT	Mauritania
MUS	Mauritius
MYT	Mayotte
MEX	Mexico
FSM	Micronesia (Federated States of)
MDA	Moldova (Republic of)
MCO	Monaco
MNG	Mongolia
MNE	Montenegro
MSR	Montserrat
MAR	Morocco
MOZ	Mozambique
MMR	Myanmar
NAM	Namibia
NRU	Nauru
NPL	Nepal
NLD	Netherlands
NCL	New Caledonia
NZL	New Zealand
NIC	Nicaragua
NER	Niger
NGA	Nigeria
NIU	Niue
NFK	Norfolk Island
MNP	Northern Mariana Islands
NOR	Norway
OMN	Oman
PAK	Pakistan
PLW	Palau
PSE	Palestine, State of
PAN	Panama
PNG	Papua New Guinea
PRY	Paraguay
PER	Peru
PHL	Philippines
PCN	Pitcairn
POL	Poland
PRT	Portugal
PRI	Puerto Rico
QAT	Qatar
REU	Réunion
ROU	Romania
RUS	Russian Federation
RWA	Rwanda
BLM	Saint Barthélemy
SHN	Saint Helena, Ascension and Tristan da Cunha
KNA	Saint Kitts and Nevis
LCA	Saint Lucia
MAF	Saint Martin (French part)
SPM	Saint Pierre and Miquelon
VCT	Saint Vincent and the Grenadines
WSM	Samoa
SMR	San Marino
STP	Sao Tome and Principe
SAU	Saudi Arabia
SEN	Senegal
SRB	Serbia
SYC	Seychelles
SLE	Sierra Leone
SGP	Singapore
SXM	Sint Maarten (Dutch part)
SVK	Slovakia
SVN	Slovenia
SLB	Solomon Islands
SOM	Somalia
ZAF	South Africa
SGS	South Georgia and the South Sandwich Islands
SSD	South Sudan
ESP	Spain
LKA	Sri Lanka
SDN	Sudan
SUR	Suriname
SJM	Svalbard and Jan Mayen
SWZ	Swaziland
SWE	Sweden
CHE	Switzerland
SYR	Syrian Arab Republic
TWN	Taiwan, Province of China[a]
TJK	Tajikistan
TZA	Tanzania, United Republic of
THA	Thailand
TLS	Timor-Leste
TGO	Togo
TKL	Tokelau
TON	Tonga
TTO	Trinidad and Tobago
TUN	Tunisia
TUR	Turkey
TKM	Turkmenistan
TCA	Turks and Caicos Islands
TUV	Tuvalu
UGA	Uganda
UKR	Ukraine
ARE	United Arab Emirates
GBR	United Kingdom of Great Britain and Northern Ireland
USA	United States of America
UMI	United States Minor Outlying Islands
URY	Uruguay
UZB	Uzbekistan
VUT	Vanuatu
VEN	Venezuela (Bolivarian Republic of)
VNM	Viet Nam
VGB	Virgin Islands (British)
VIR	Virgin Islands (U.S.)
WLF	Wallis and Futuna
ESH	Western Sahara
YEM	Yemen
ZMB	Zambia
ZWE	Zimbabwe

## Sheet: stand_and_species_dic
st_growth_condition value	st_growth_condition description	Terrain_value	Terrain_description	Aspect_value	Aspect_description	soil_texture value	soil_texture description	leaf_habit value	leaf_habit description
Naturally regenerated, unmanaged	Naturally regenerated stand, without any forest management applied in the 10 years previous to the start of sap flow measurements.	Flat	Site is flat with no significant land surface changes.	Flat	The site is flat and the exposure is not in any specific direction.	SAND	According to USDA classification. http://www.nrcs.usda.gov/wps/portal/nrcs/detail/soils/survey/?cid=nrcs142p2_054167	evergreen	Plants that keep leaves all year round.
Naturally regenerated, managed	Naturally regenerated stand, with management applied within the 10 years previous to the start of sap flow measurements.	Undulated/Variable	Use this category for particular locations (i.e. terraced terrain, locally flat but within a slope)	N	North	LOAM	According to USDA classification.	cold deciduous	Plants that drop their leaves during the cold season.
Plantation, managed	Plantation, with management applied within the 10 years previous to the start of sap flow measurements.	Valley	Site is in a valley, with slopes all around.	E	East	SILT	According to USDA classification.	drought deciduous	Plants that drop their leaves during the dry season.
Plantation, unmanaged	Plantation, without any forest management applied in the 10 years previous to the start of sap flow measurements.	Gentle slope (<2 %)	Site is in a slope.	S	South	CLAY	According to USDA classification.	marcescent	Plants that retain their leaves after abscission.
Orchard	Plantation for fruit or nut production.	Medium Slope (>2 %, <5%)	Site is in a slope.	W	West
Urban	Plantation or natural stand in urban environment.	Significant Slope (>5%, <10%)	Site is in a slope.
		Strong Slope (>10%)	Site is in a slope.
		Hilltop	Site is on the top of a hill.

## Sheet: plant_dic
social_status value	social_status description	sens_meth value	sens_meth description	sens_manuf value	sens_manuf description	senscor_grad value	senscor_grad description	senscor_zero value	senscor_zero description	pl_sens_calib value	pl_sens_calib description	pl_sap_units value	pl_sap_units description	pl_radial_int value	pl_radial_int description	pl_azimut_int value	pl_azimut_int description
dominant	Plants with crowns extending above the general level of the main canopy , receiving full light from above and partly from the sides.	CAG	Calibrated average gradient	Lab made	Manufactured in the lab	No correction	No correction for the influence of natural temperature gradients (NTG) is applied.	Previous night zero flow	Assume zero flow values every night (e.g. use of previous night’s dtmax in the HD method).	TRUE	A species-specific calibration (either derived in the same study or taken from elsewhere) is used to calculate sap flux density.	“cm3 cm-2 h-1”	sap flux density (per unit sapwood area).	No radial correction	No correction was applied.	No azimuthal correction	No correction was applied.
codominant	Plants with crowns forming the general level of the main canopy, receiving full light from above and comparatively little from the sides.	HD	Constant heat dissipation	Dynamax	http://www.dynamax.com/	NTG separately measured	NTG are measured and accounted for in the sensor measurements (i.e. substracted from sensor readings automatically or during sap flow calculations).	Long time-window zero flow	Sensor readings representative of zero flow conditions are assessed over a longer time window (~some days) , using various approaches (e.g. Granier’s double regression method, and similar).	FALSE	No species-specific calibration is applied to calculate sap flux density (original calibration is applied, or no calibration is needed).	“cm3 m-2 s-1”	sap flux density (per unit sapwood area).	Sensor-integrated	Radial variation of sap flux density within the stem is integrated by the measurement principle of the method (e.g. heat balance methods).	sensor_integrated	Azimuthal variation of sap flux density within the stem is integrated by the measurement principle of the method (e.g. heat balance methods).
suppressed	Plants that have their crowns completely covered by the crowns of one or more neighboring individuals.	CHP	Compensation heat pulse	UP GmbH	https://www.upgmbh.com/startseite/	NTG measured in cyclic heating deisgn	NTG are measured in a cyclic heating design to correct the sensor measurements.	Moist nights zero flow	Retain sensor readings during nights with low evaporative demand (i.e. using rh or vpd thresholds) and interpolation of gaps when conditions are not met. This includes estimates from intercepts of sensor readings vs vpd.			“dm3 dm-2 h-1”	sap flux density (per unit sapwood area).	Measured	Sap flux density is measured in 2 or more points along the xylem depth and used to upscale to tree level sap flow (e.g. needle-based methods with 2 or more thermocouples in depth).	measured	Sap flux density is measured in 2 or more points within the stem circumference and used to upscale to tree level sap flow.
		CHD	Cyclic heat dissipation	Ecomatik	http://www.ecomatik.de/en/index.php	NTG modelled	NTG are modelled using environmental data and readings from unheated probes.	Manipulative zero flow	Manipulation of transpiration conditions or xylem severing to induce zero flow conditions.			“dm3 dm-2 s-1”	sap flux density (per unit sapwood area).	Corrected, measured radial variation	Radial variation is measured in the same (or nearby) trees, to derive correction coefficients/integration functions which are then applied to single-point sensors monitoring seasonal sap flow.	Corrected, measured azimuthal variation	Azimuthal variation is measured in the same (or nearby) trees, to derive correction coefficients/integration functions which are then applied to single-point sensors monitoring seasonal sap flow.
		HFD	Heat Field Deformation	PlantSensors	http://plantsensors.diytrade.com/	Other/unknown		Not needed	The methods does not need an estimation of zero flow conditions.			“mm3 mm-2 s-1”	sap flux density (per unit sapwood area).	Corrected, species coefficients	Species-specific radial correction coefficients (from published or other external sources) applied to single-point sensors monitoring seasonal sap flow.
		HPTM	Heat Pulse Tmax method	ICT International	http://www.ictinternational.com			Other/unknown	Please specify in the remarks.			“g m-2 s-1”	sap flux density (per unit sapwood area).	Corrected, other coefficients	Radial correction coefficients from other species applied to single-point sap flow sensors monitoring seasonal sap flow.
		HR	Heat Ratio Method	Ems Brno	http://www.emsbrno.cz							“kg m-2 h-1”	sap flux density (per unit sapwood area).
		SFPLUS	Sapflow +	East30	http://www.east30sensors.com							“kg m-2 s-1”	sap flux density (per unit sapwood area).
		SHB	Stem heat balance	Tranzflo	www.tranzflo.co.nz							“cm3 s-1”	sap flow (per tree).
		TSHB	Trunk segment heat balance	Phytech	www.phytech.com							“cm3 h-1”	sap flow (per tree).
		Other/unknown		Puech Asociados	http://www.puechasociados.es/							“dm3 h-1”	sap flow (per tree).
				Advanced Measurements and Controls	Website not operative							“g h-1”	sap flow (per tree).
				HortResearch	Palmerston, New Zealand							“kg h-1”	sap flow (per tree).
				Greenspan Technology	Warwick, Australia
				Other/unknown

[truncated: 1 more sheets: environmental_dic]
